# Supplementary material for: Application of an ionic-liquid combined with ultrasonic-assisted dispersion ofgold nanoparticles for micro-solid phase extraction of unmetabolized pyridoxine and folic acid in biological fluids prior to high-performance liquid chromatography
Source: Royal Society of Chemistry journal article supplement (doi:10.1039/c5ra08601a), 2015-01-01
Supplement: c5ra08601a1.pdf [file c5ra08601a1.pdf]

Electronic Supplementary Information

**Application of ionic-liquid combined with ultrasonic-assisted dispersive gold nanoparticles for micro-solid phase extraction of unmetabolized pyridoxine and folic acid in biological fluids prior to high-performance liquid chromatography**

Fahimeh Zare<sup>1</sup>, Mehrorang Ghaedi<sup>1,\*</sup>, Ali Daneshfar<sup>2</sup>

*1 Department of chemistry, Faculty of sciences, Yasouj University, Yasouj 75918-74831, Iran.*

*2 Department of chemistry, Faculty of sciences, Ilam University, Ilam 69315-516, Iran.*

*\*Corresponding author: Tel./Fax: + 98 743 222 3048.*

*E-mail: m\_ghaedi@yahoo.com*

**Table of contents in Supporting Information:**

**Fig.S 1.** (a) Typical SEM image of the Au NPs; (b) XRD analysis of Au NPs.

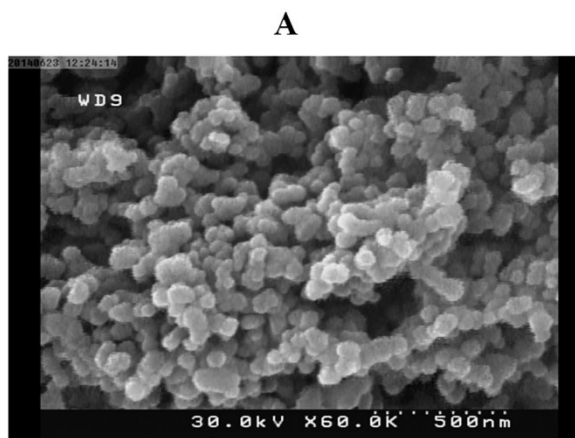

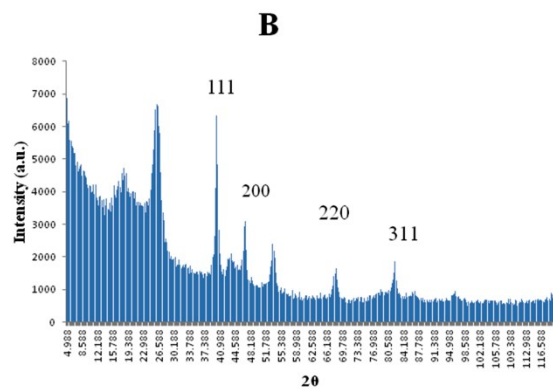

**Fig. S1.**

**Fig. S2.** Typical chromatogram of present method for plasma sample spiked with 100 ng mL<sup>-1</sup> of pyridoxine and folic acid.

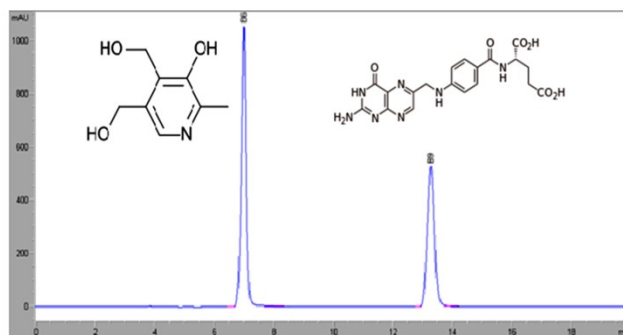

**Fig.S2.**
